# Supplementary material
Source: PubMed Central journal article supplement (PMC6965679)
Supplement: BPH-176-4653-s001.pdf [file BPH-176-4653-s001.pdf]

## Supplementary Figure 1

### Structure of selected SCRA

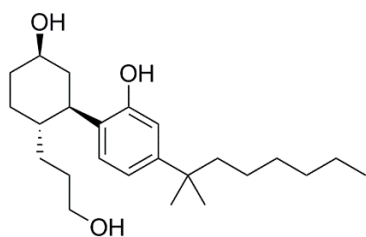

CP55940

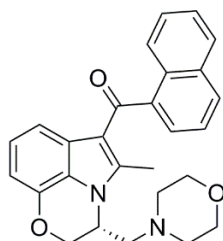

WIN55212-2

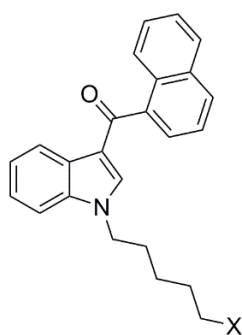

JWH-018 (X = H)  
AM-2201 (X = F)

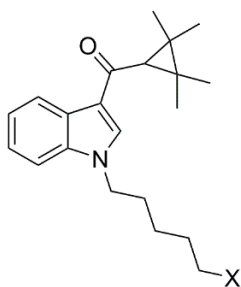

UR-144 (X = H)  
XLR-11 (X = F)

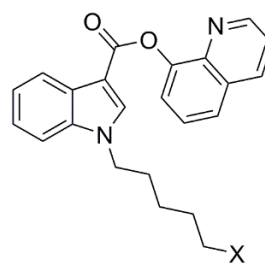

PB-22 (X = H)  
5F-PB-22 (X = F)

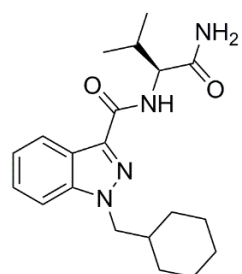

AB-CHMINACA

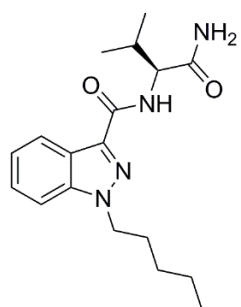

AB-PINACA

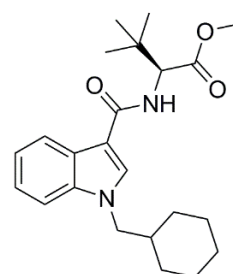

MDMB-CHMICA

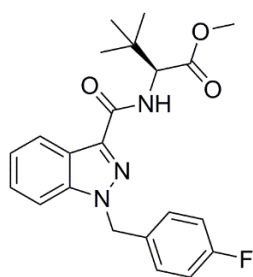

MDMB-FUBINACA

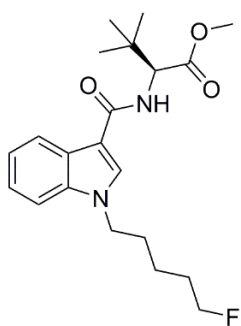

5F-MDMB-PICA

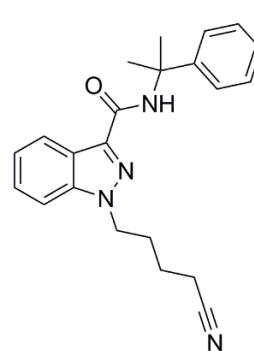

CUMYL-4CN-BINACA

## Supplementary Figure 2

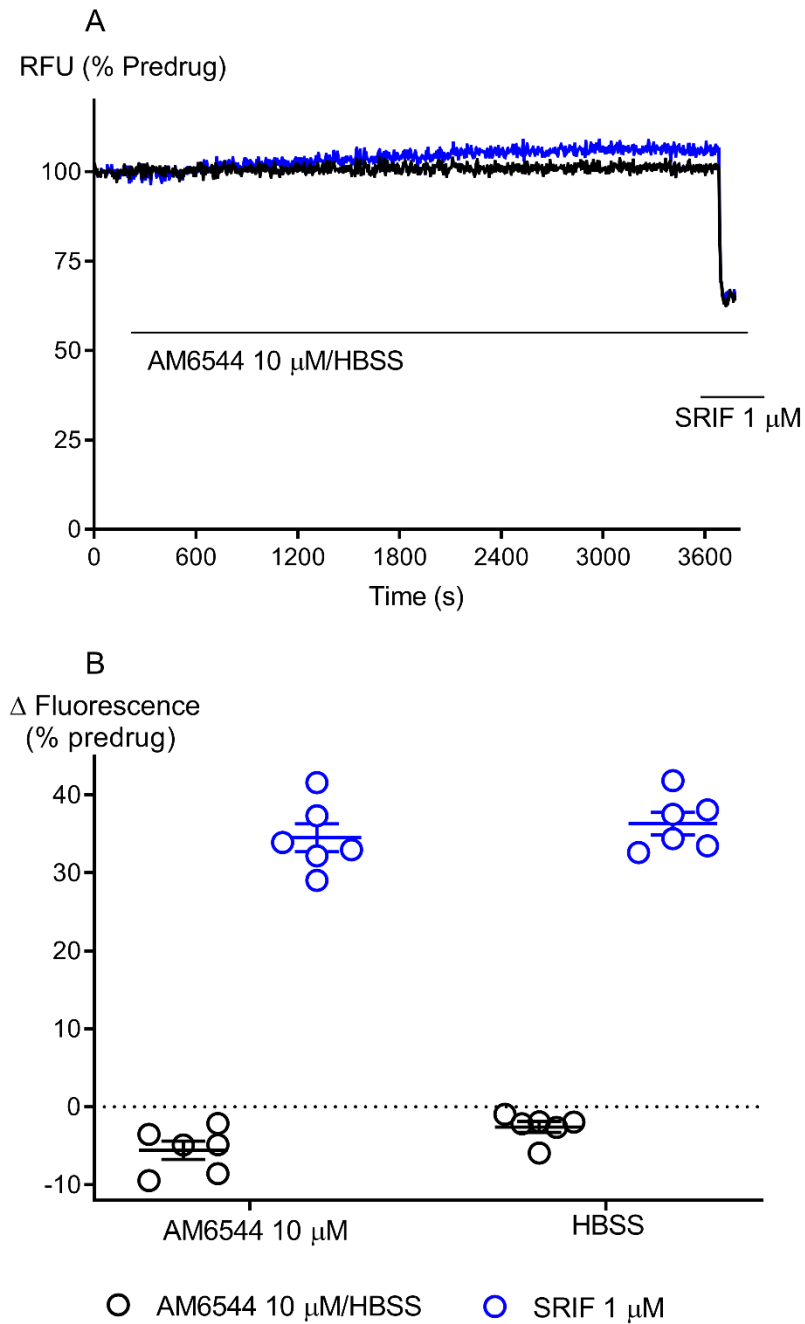

AM6544 does not activate GIRK channels in AtT20 cells. (A) Raw trace showing minimal changes in hyperpolarisation induced by maximally effective concentration (10  $\mu$ M) of AM6544 or vehicle on At-T20-CB1 cells (B) Scatter dot plot showing the percentage change in fluorescence of SRIF (1  $\mu$ M) on AtT20-CB1 cells in the presence of HBSS or AM6544 (10

$\mu\text{M}$ ) for 60 mins. Data represents the mean  $\pm$  SEM of 6 independent determinants performed in duplicate.

Supplementary Table 1

Functional activity of CP55940,  $\Delta^9$ -THC, and other SCRAs. Values were calculated using the four-parameter nonlinear regression to fit the concentration response curves.

| Compound         | pEC <sub>50</sub> ± SEM (EC <sub>50</sub> , nM) |
|------------------|-------------------------------------------------|
| CP55940          | 7.62 ± 0.07 (23)                                |
| WIN55212-2       | 6.7 ± 0.05 (200)                                |
| $\Delta^9$ -THC  | 6.81 ± 0.12 (156)                               |
| 2-AG             | 6.47 ± 0.07 (338)                               |
| AEA              | 5.91 ± 0.07 (1229)                              |
| JWH-018          | 7.37 ± 0.08 (43)                                |
| AM-2201          | 8.02 ± 0.1 (9.6)                                |
| UR-144           | 6.3 ± 0.08 (503)                                |
| XLR-11           | 7.14 ± 0.08 (72)                                |
| PB-22            | 8.36 ± 0.05 (4.4)                               |
| 5F-PB-22         | 9.02 ± 0.08 (0.95)                              |
| AB-CHMINACA      | 7.67 ± 0.14 (21)                                |
| AB-PINACA        | 8.68 ± 0.08 (2.1)                               |
| MDMB-CHMICA      | 8.33 ± 0.09 (4.7)                               |
| MDMB-FUBINACA    | 9.1 ± 0.13 (0.8)                                |
| 5F-MDMB-PICA     | 9.15 ± 0.08 (0.7)                               |
| CUMYL-4CN-BINACA | 9.16 ± 0.08 (0.68)                              |
